# Supplementary material for: Ordered mesoporous zirconium oxophosphate supported tungsten oxide solid acid catalysts: the improved Brønsted acidity for benzylation of anisole
Source: Royal Society of Chemistry journal article supplement (doi:10.1039/c4ra02809k), 2014-01-01
Supplement: c4ra02809k1.pdf [file c4ra02809k1.pdf]

# Ordered mesoporous zirconium oxophosphate supported tungsten oxide solid acid catalysts: the improved Brønsted acidity for benzylation of anisole

Zhichao Miao<sup>a,b</sup>, Huahua Zhao<sup>a</sup>, Huanling Song<sup>a,c</sup>, Lingjun Chou<sup>a,c\*</sup>

<sup>a</sup> State Key Laboratory for Oxo Synthesis and Selective Oxidation, Lanzhou Institute of Chemical Physics, Chinese Academy of Sciences, Lanzhou 730000, People's Republic of China.

<sup>b</sup> University of Chinese Academy of Sciences, Beijing 100049, People's Republic of China.

<sup>c</sup> Suzhou Institute of Nano-Tech and Nano-Bionics, Chinese Academy of Sciences, Suzhou 215123, People's Republic of China.

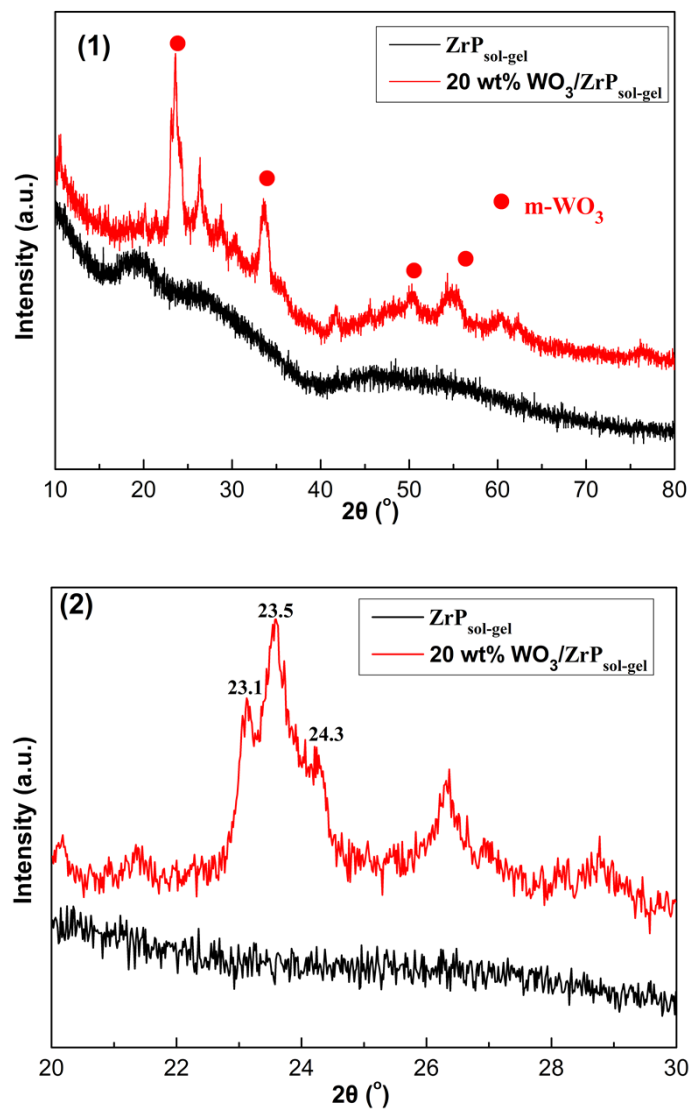

**Figure S1.** Wide-angle X-ray diffraction patterns of  $\text{ZrP}_{\text{sol-gel}}$  and  $20 \text{ wt}\% \text{WO}_3/\text{ZrP}_{\text{sol-gel}}$

gel-

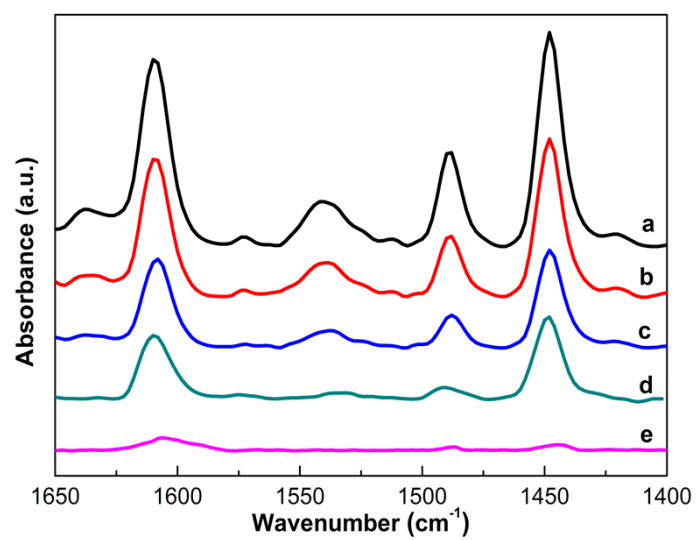

**Figure S2.** IR spectra for pyridine adsorbed on the 20 wt%WO<sub>3</sub>/M-ZrPO recorded at different temperature: **(a)** 150, **(b)** 200, **(c)** 250, **(d)** 300 and **(e)** 400 °C.

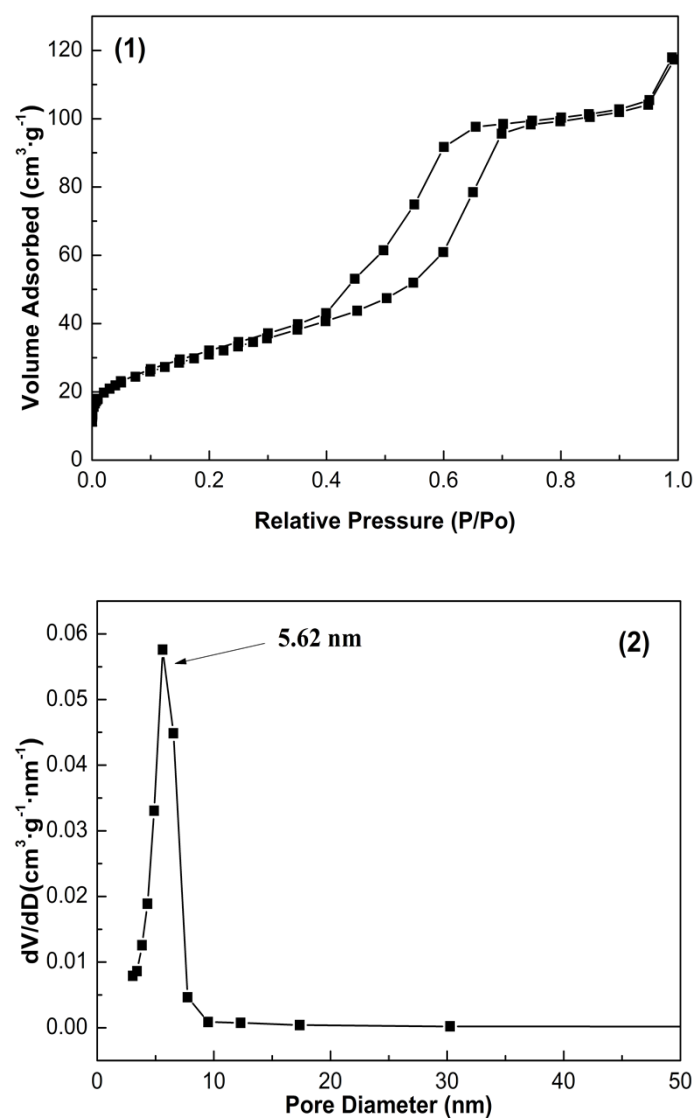

**Figure S3.** Isotherms (1) and pore size distribution (2) of 20 wt%  $\text{WO}_3/\text{M-ZrPO}$ -used after five cycles.

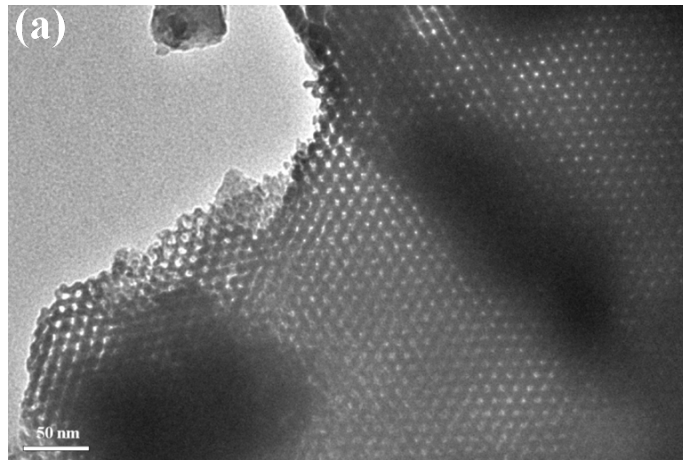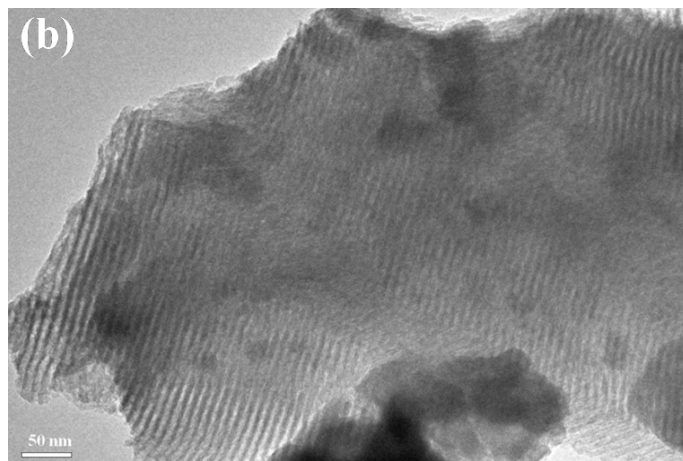

**Figure S4.** TEM images of 20 wt%WO<sub>3</sub>/M-ZrPO-used after five cycles.
